# Supplementary material for: Inhibition of double‐strand DNA‐sensing cGAS ameliorates brain injury after ischemic stroke
Source: PubMed Central journal article supplement (PMC7136961; doi:10.15252/emmm.201911002), 2020-04-01
Supplement: EMMM-12-e11002-s001.pdf [file EMMM-12-e11002-s001.pdf]

# **Inhibition of double-strand DNA sensing cGAS ameliorates brain injury after ischemic stroke**

Qian Li, Yuze Cao, Chun Dang, Bin Han, Ranran Han, Heping Ma, Junwei Hao, and Lihua Wang

## **Appendix**

### **Contents**

**Appendix Figure S1**

**Appendix Figure S2**

**Appendix Figure S3**

**Appendix Figure S4**

**Appendix Figure S5**

**Appendix Figure S6**

**Appendix Figure S7**

**Appendix Figure S8**

**Appendix Figure S9**

**Appendix Table S1**

**Appendix Table S2**

### Appendix Figure S1

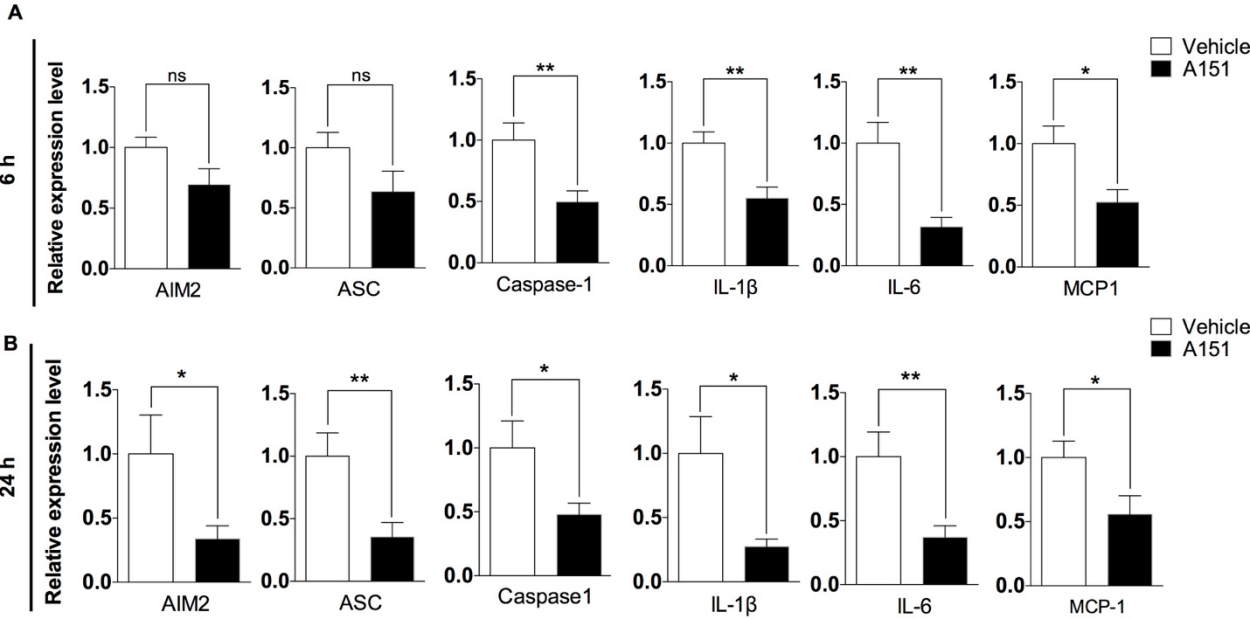

Appendix Figure S1. Administration of A151 dampens the expression of inflammasome-related molecules and inflammatory cytokines at early time points of 6 h and 24 h. The mRNA expression levels of the AIM2 inflammasome components (AIM2/caspase-1/ASC) and levels of IL-1 $\beta$ , and several downstream inflammatory cytokines/chemokines (IL-6, MCP-1) of indicated groups after MCAO at (A) 6 h and (B) 24 h. n = 6 per group. \*P < 0.05, \*\*P < 0.01, two-tailed unpaired Student’s t test. Data information: Data are expressed as mean  $\pm$  SEM. P-values are reported in Appendix Table S2.

### Appendix Figure S2

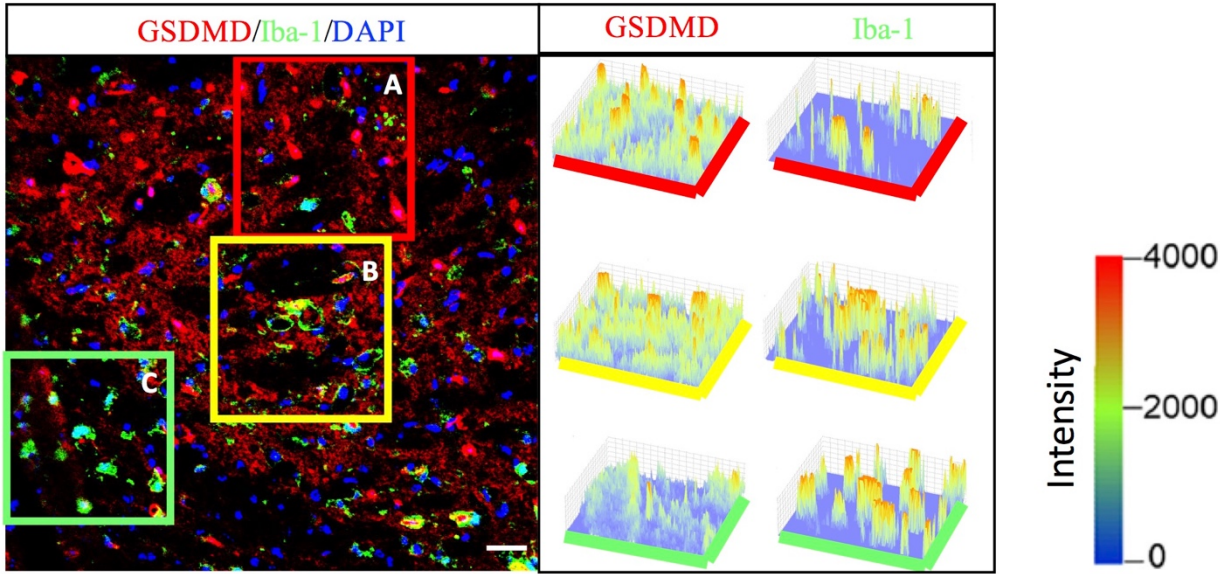

Appendix Figure S2. Microglial pyroptosis stained for Iba-1 and GSDMD in brain of MCAO mice. This representative image illustrates that microglia undergoing pyroptosis (indicated by reference boxes A red, B yellow, and C green). Right panels indicate results of a 2.5D intensity analysis of Iba-1 and GSDMD immunostaining. Scale bar, 20  $\mu$ m.

### Appendix Figure S3

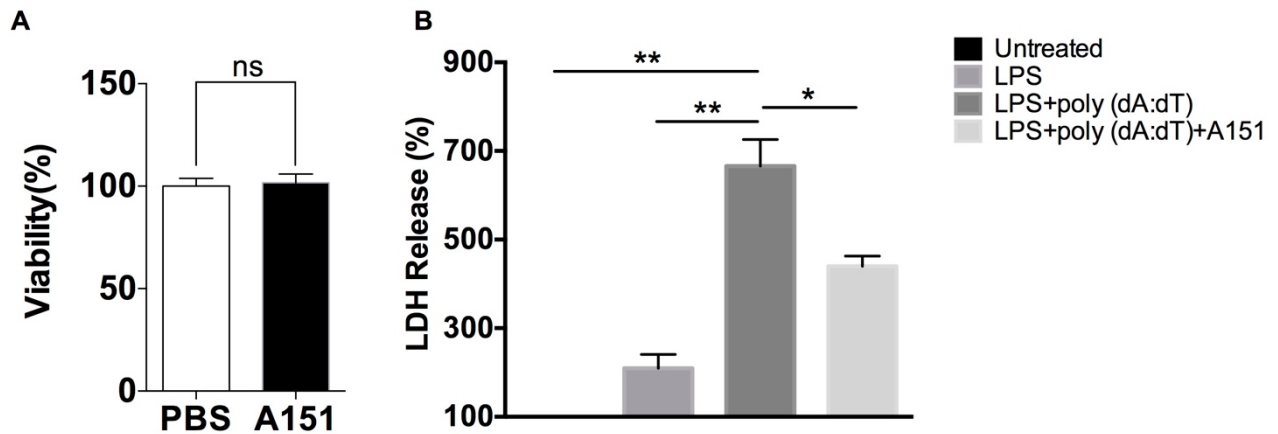

Appendix Figure S3. (A) Cytotoxicity was assessed by MTS assay.  $P > 0.05$ , two-tailed unpaired Student's *t* test. (B) Microglial loss was assessed using an LDH activity assay.  $n = 3$  per group. \* $P < 0.05$ , \*\* $P < 0.01$ , one-way ANOVA followed by Tukey post hoc test. Data information: Data are expressed as mean  $\pm$  SEM. *P*-values are reported in Appendix Table S2.

### Appendix Figure S4

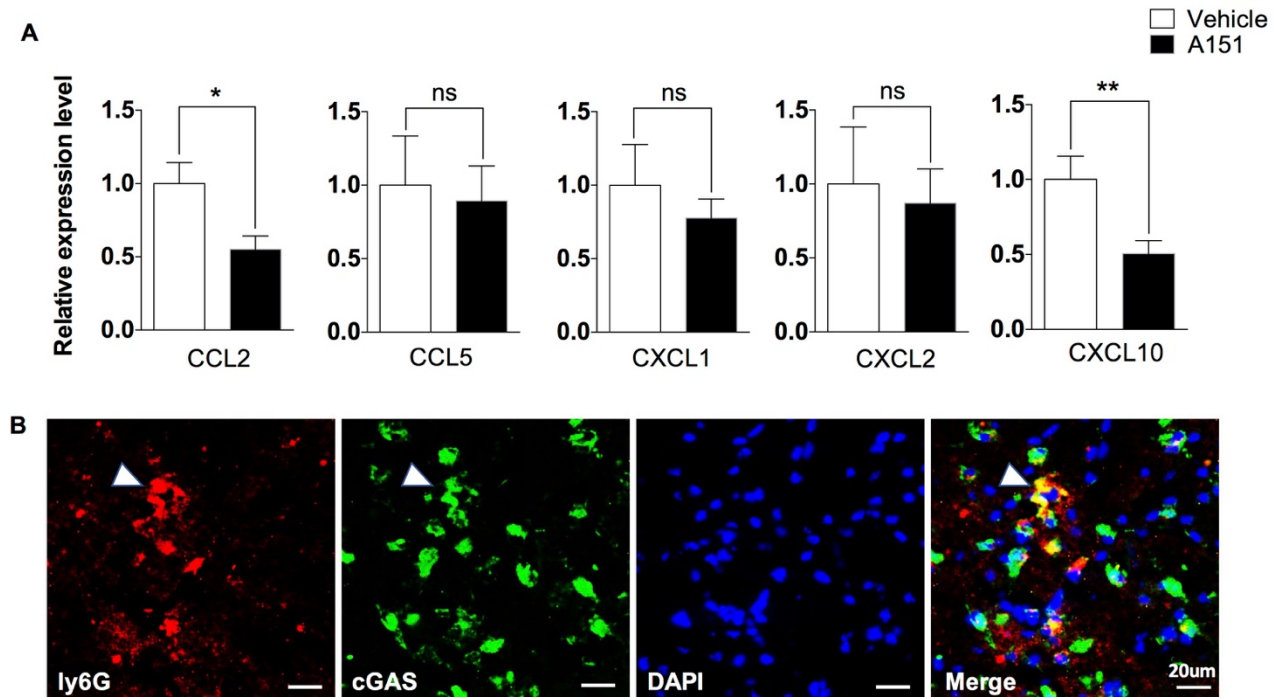

Appendix Figure S4. (A) A151 reduces neutrophil chemoattractants CCL2 and CXCL10. qPCR analysis of chemokines related to the infiltrated neutrophils in vehicle- and A151-treated mice at day 3 after MCAO. n = 6 per group. \*P < 0.05, \*\*P < 0.01, two-tailed unpaired Student's t test. (B) Neutrophils co-express cGAS in the penumbra of MCAO mice. Representative immunofluorescence staining for neutrophil marker ly6G (red) and cGAS (green). Data information: Data are expressed as mean  $\pm$  SEM. P-values are reported in Appendix Table S2.

## Appendix Figure S5

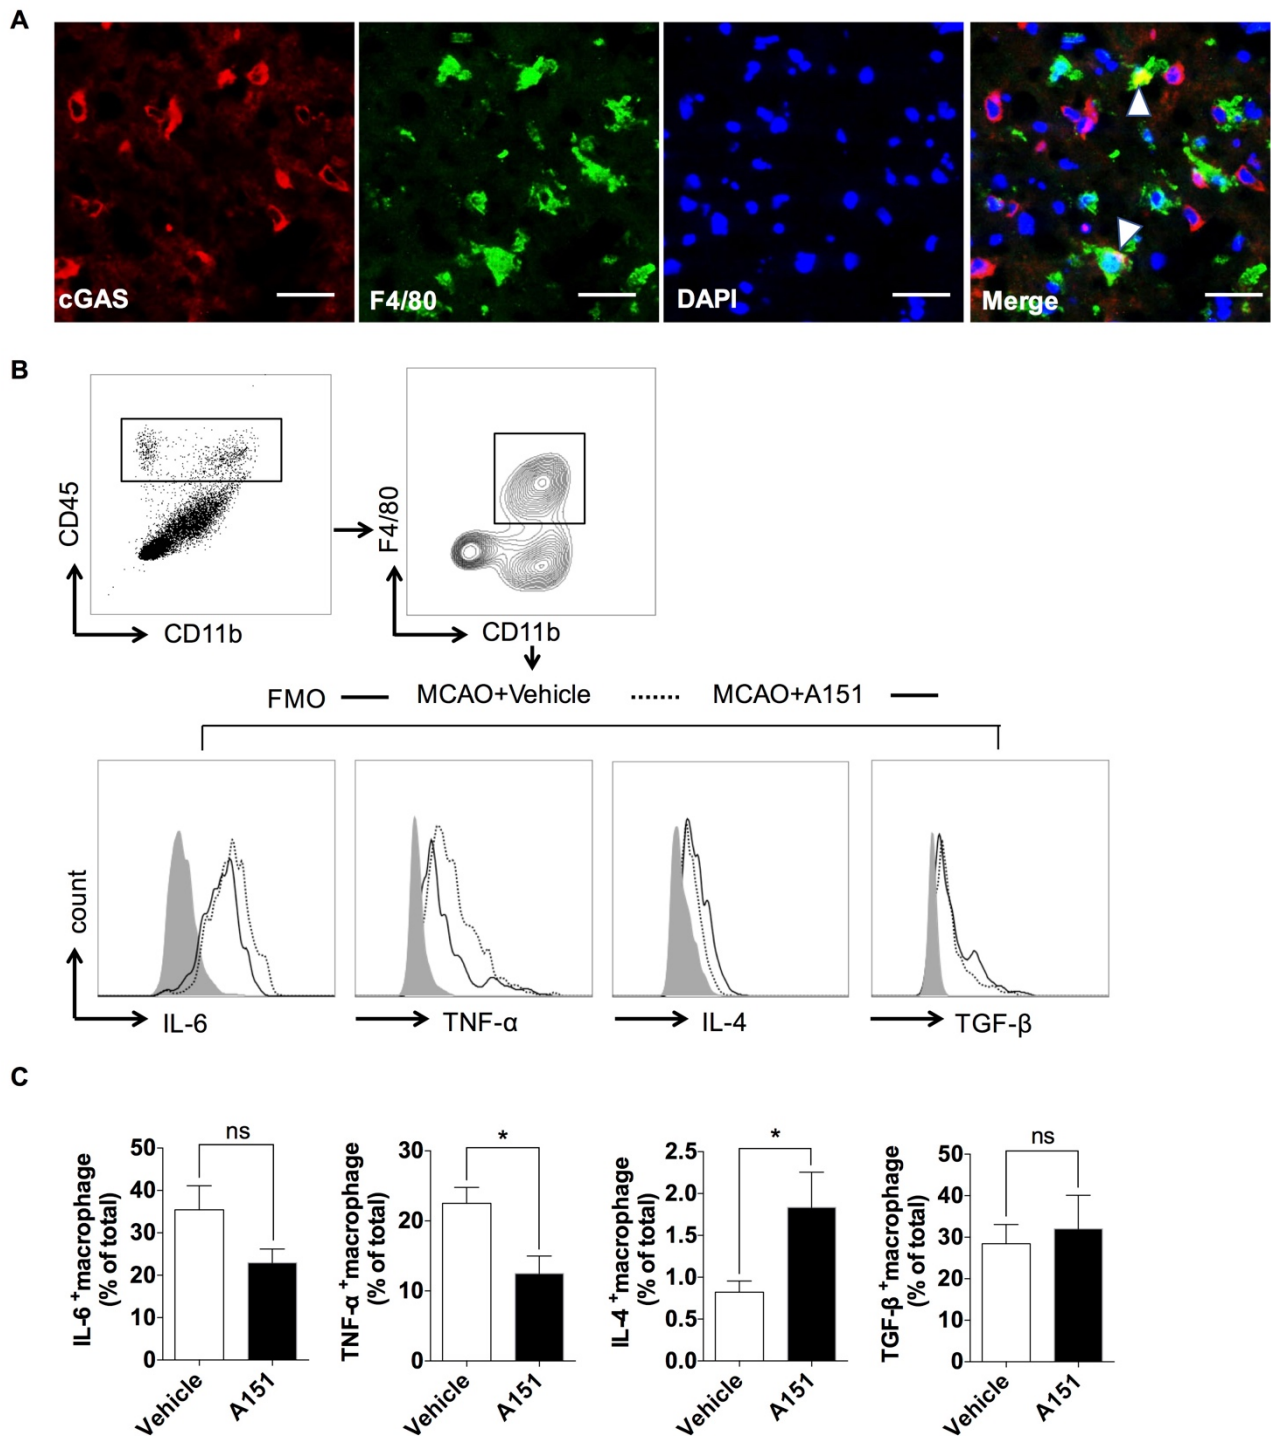

Appendix Figure S5. A151 affects the effect of macrophages. (A) Macrophage marker F4/80 (green) and cGAS (red) co-localize within the same cells (White arrows). (B) Gating strategy for the expression of interleukin-6 (IL-6), IL-4, TNF- $\alpha$ , and TGF- $\beta$  in macrophages of brains at day 3 after MCAO. (C) Graphs show quantified data.  $n = 6$  per group. \* $P < 0.05$ , two-tailed unpaired Student's  $t$  test. Data information: Data are expressed as mean  $\pm$  SEM. P-values are reported in Appendix Table S2.

## Appendix Figure S6

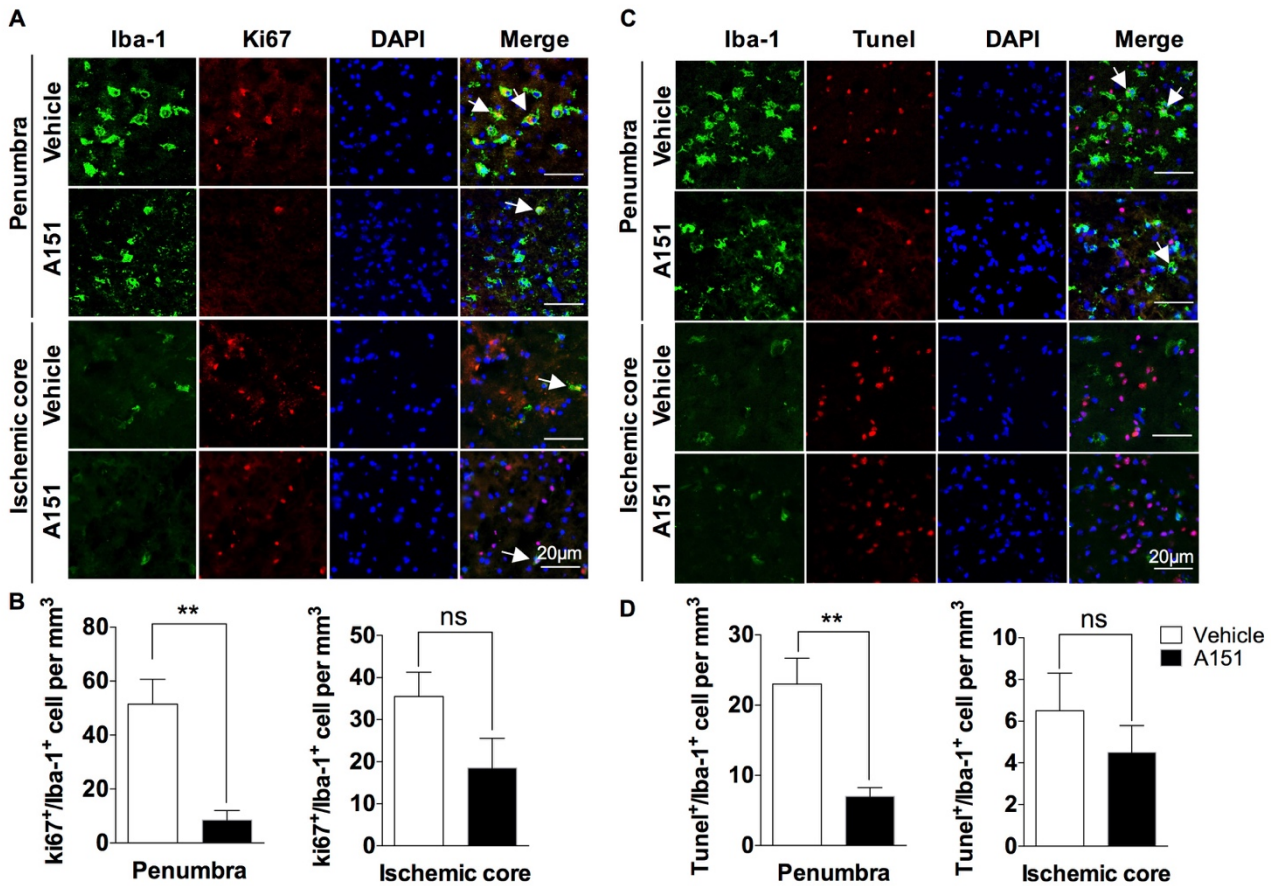

Appendix Figure S6. A151 reduces microglial cell death and proliferation after stroke. (A and C) Representative double immunofluorescence stainings for apoptosis and proliferation of microglia in the penumbra and ischemic core in vehicle - and A151- treated MCAO mice using ki67 (left panel) and TUNEL staining (right panel) at day 3 after MCAO. (B and D) Quantification of ki67/Iba-1 and TUNEL/Iba-1 double-positive cells. n = 6 per group. \*\*P < 0.01, two-tailed unpaired Student's t test. Scale bars, 20  $\mu$ m. Data information: Data are expressed as mean  $\pm$  SEM. P-values are reported in Appendix Table S2.



## Appendix Figure S7

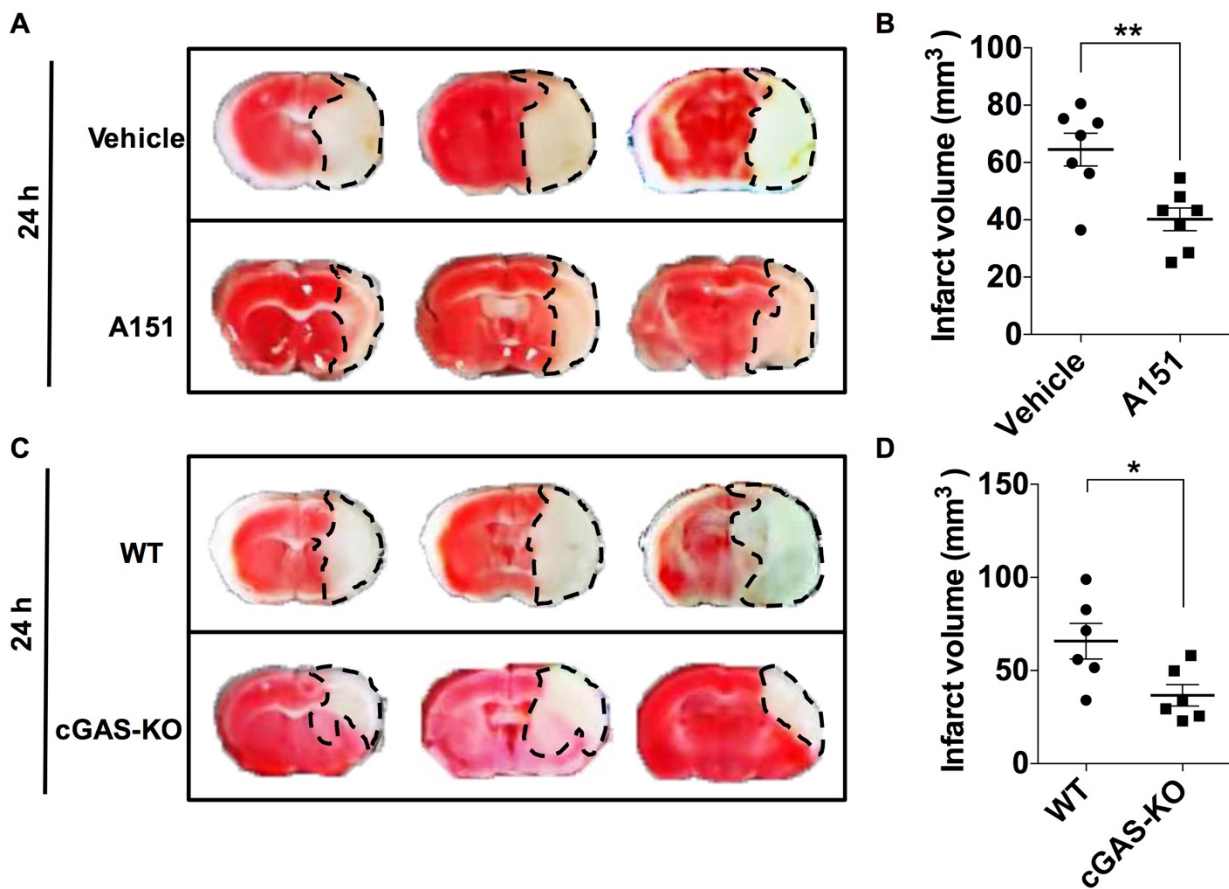

Appendix Figure S7. A151 treatment and microglial cGAS inactivation attenuates ischemic brain injury at 24 h after MCAO. (A) TTC-stained brain slices showing the infarct areas (dark dashed lines) of mice receiving A151 or vehicle at 24 h after reperfusion. The red regions show intact areas; pale regions show infarct areas. (B) Graph show the infarct volumes in vehicle- and A151-treated MCAO mice.  $n = 7$  per group.  $**P < 0.01$ , two-tailed unpaired Student's  $t$  test. (C) Representative TTC-stained coronal sections from WT and cGAS-KO mice after 24 h of reperfusion following MCAO. (D) Graph show the infarct volumes of brain infarct volume.  $n = 6$  per group.  $*P < 0.05$ , two-tailed unpaired Student's  $t$  test. Data information: Data are expressed as mean  $\pm$  SEM. P-values are reported in Appendix Table S2.

## Appendix Figure S8

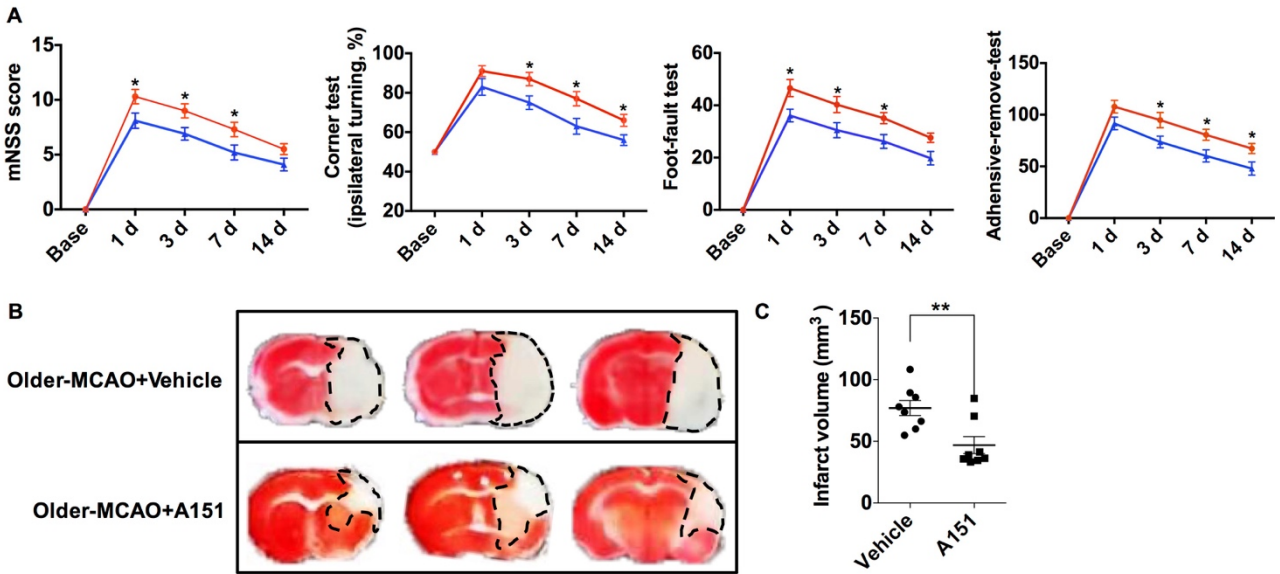

Appendix Figure S8. A151 attenuates brain injury and improves neurological function in older mice after MCAO. (A) Neurological deficits including mNSS score, corner turning test, foot-fault test, and adhesive-removal test were performed at baseline, days 1, 3, 7, and 14 after MCAO.  $n = 10$  per group. \* $P < 0.05$ , \*\* $P < 0.01$ , two-way ANOVA with Bonferroni post hoc test. (B) Representative TTC staining images at 24 h after MCAO in vehicle- and A151 treated older mice and (C) quantification of infarct lesions.  $n = 8$  per group. \* $P < 0.05$ , two-tailed unpaired Student's  $t$  test. Data information: Data are expressed as mean  $\pm$  SEM. P-values are reported in Appendix Table S2.



## Appendix Figure S9

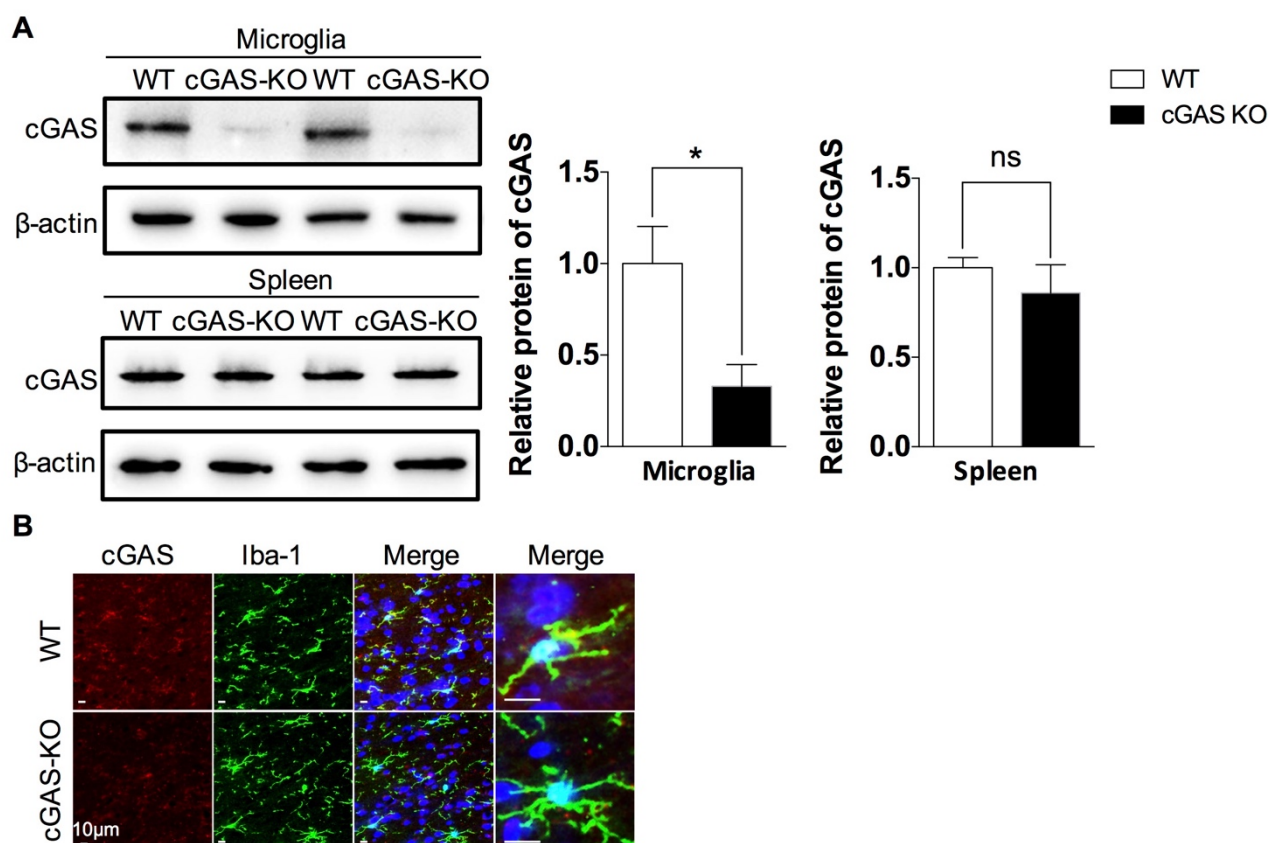

Appendix Figure S9. (A) cGAS expression in microglia and monocytes were assessed by western blot.  $n = 4$  per group.  $*P < 0.05$ , two-tailed unpaired Student's  $t$  test. (B) Representative double immunofluorescence stainings for cGAS and Iba-1 in WT and cGAS-KO mice. Scale bars, 10  $\mu$ m. Data information: Data are expressed as mean  $\pm$  SEM. P-values are reported in Appendix Table S2.

**Appendix Table S1.** Primers used in the study.

| Primer, 5'–3' |                      |                         |
|---------------|----------------------|-------------------------|
| Gene          | Forward              | Reverse                 |
| CXCL1         | CTGCCTTGACCCTGAAGTCT | AGCAGTCTGTCTTCTTTCTCCGT |
| CXCL2         | AGGGCGGTCAAAAAGTTTGC | CGAGTACGATCCAGGCTTGC    |
| CXCL10        | AAGCTATGTGGAGGTGCGAC | AACCCCTTGGGAAGATGGTG    |
| CCL2          | CTGCTGTTACAGTTGCCG   | GCACAGACCTCTCTTTGAGC    |

| Primer, 5'–3' |                      |                        |
|---------------|----------------------|------------------------|
| CCL5          | GTGCTCCAATCTTGCAGTAG | GGATTACTGAGTGGCATCCCC  |
| IL-6          | AGCCAGAGTCCTTCAGAGAG | AGGAGAGCATTGGAAATTGGGG |
| MCP-1         | ACGCTTCTGGGCCTGTTGTT | CCTGCTGCTGGTGATTCTCT   |

**Appendix Table S2.** List of exact P-values

| <b>Fig 1D</b>                       | <b>Individual P Value</b> |
|-------------------------------------|---------------------------|
| contralateral vs. Ipsilateral cGAS  | 0.000530374               |
| contralateral vs. Ipsilateral STING | 0.000917775               |
| <b>Fig 1F</b>                       | <b>Individual P Value</b> |
| Sham vs. MCAO cGAS                  | < 0.0001                  |
| <b>Figure 2A</b>                    | <b>Individual P Value</b> |
| cGAS                                |                           |
| Sham+Vehicle vs. MCAO+Vehicle       | 0.0025                    |
| Sham+Vehicle vs. MCAO+A151          | 0.9539                    |
| MCAO+Vehicle vs. MCAO+A151          | 0.0058                    |
| STING                               |                           |
| Sham+Vehicle vs. MCAO+Vehicle       | 0.0006                    |
| Sham+Vehicle vs. MCAO+A151          | 0.6844                    |
| MCAO+Vehicle vs. MCAO+A151          | 0.0078                    |
| <b>Fig 2C</b>                       | <b>Individual P Value</b> |
| cGAS                                |                           |
| Sham+Vehicle vs. MCAO+Vehicle       | 0.0006                    |
| Sham+Vehicle vs. MCAO+A151          | 0.1527                    |
| MCAO+Vehicle vs. MCAO+A151          | 0.0295                    |
| STING                               |                           |
| Sham+Vehicle vs. MCAO+Vehicle       | 0.0021                    |
| Sham+Vehicle vs. MCAO+A151          | 0.3808                    |
| MCAO+Vehicle vs. MCAO+A151          | 0.0322                    |
| NF-kB                               |                           |
| Sham+Vehicle vs. MCAO+Vehicle       | 0.0006                    |
| Sham+Vehicle vs. MCAO+A151          | 0.1046                    |
| MCAO+Vehicle vs. MCAO+A151          | 0.0426                    |
| <b>Figure 2D</b>                    | <b>Individual P Value</b> |
| AIM2                                |                           |
| Sham+Vehicle vs. MCAO+Vehicle       | 0.0041                    |
| Sham+Vehicle vs. MCAO+A151          | 0.8827                    |

|                               |                           |
|-------------------------------|---------------------------|
| MCAO+Vehicle vs. MCAO+A151    | 0.0154                    |
| ASC                           |                           |
| Sham+Vehicle vs. MCAO+Vehicle | 0.0003                    |
| Sham+Vehicle vs. MCAO+A151    | 0.2252                    |
| MCAO+Vehicle vs. MCAO+A151    | 0.0101                    |
| Caspase-1                     |                           |
| Sham+Vehicle vs. MCAO+Vehicle | 0.0047                    |
| Sham+Vehicle vs. MCAO+A151    | 0.8712                    |
| MCAO+Vehicle vs. MCAO+A151    | 0.0187                    |
| GSDMD                         |                           |
| Sham+Vehicle vs. MCAO+Vehicle | 0.0314                    |
| Sham+Vehicle vs. MCAO+A151    | 0.9835                    |
| MCAO+Vehicle vs. MCAO+A151    | 0.0477                    |
| IL-1 $\beta$                  |                           |
| Sham+Vehicle vs. MCAO+Vehicle | 0.0001                    |
| Sham+Vehicle vs. MCAO+A151    | 0.1323                    |
| MCAO+Vehicle vs. MCAO+A151    | 0.039                     |
| IL-18                         |                           |
| Sham+Vehicle vs. MCAO+Vehicle | 0.0011                    |
| Sham+Vehicle vs. MCAO+A151    | 0.3912                    |
| MCAO+Vehicle vs. MCAO+A151    | 0.0415                    |
| <b>Fig 2F</b>                 | <b>Individual P Value</b> |
| AIM2                          |                           |
| Sham+Vehicle vs. MCAO+Vehicle | 0.0252                    |
| Sham+Vehicle vs. MCAO+A151    | 0.9971                    |
| MCAO+Vehicle vs. MCAO+A151    | 0.0291                    |
| ASC                           |                           |
| Sham+Vehicle vs. MCAO+Vehicle | 0.005                     |
| Sham+Vehicle vs. MCAO+A151    | 0.5568                    |
| MCAO+Vehicle vs. MCAO+A151    | 0.0404                    |
| caspase-1                     |                           |
| Sham+Vehicle vs. MCAO+Vehicle | 0.0028                    |
| Sham+Vehicle vs. MCAO+A151    | 0.6665                    |
| MCAO+Vehicle vs. MCAO+A151    | 0.0158                    |
| IL-1 $\beta$                  |                           |
| Sham+Vehicle vs. MCAO+Vehicle | 0.0056                    |
| Sham+Vehicle vs. MCAO+A151    | 0.8255                    |
| MCAO+Vehicle vs. MCAO+A151    | 0.0182                    |
| GSDMD                         |                           |
| Sham+Vehicle vs. MCAO+Vehicle | 0.0053                    |
| Sham+Vehicle vs. MCAO+A151    | 0.7918                    |
| MCAO+Vehicle vs. MCAO+A151    | 0.0198                    |
| <b>Figure 3B</b>              | <b>Individual P Value</b> |

|                                            |                           |
|--------------------------------------------|---------------------------|
| IL-1 $\beta$                               |                           |
| Sham+Vehicle vs. MCAO+Vehicle              | < 0.0001                  |
| Sham+Vehicle vs. MCAO+A151                 | 0.1155                    |
| MCAO+Vehicle vs. MCAO+A151                 | 0.0089                    |
| Caspase-1                                  |                           |
| Sham+Vehicle vs. MCAO+Vehicle              | < 0.0001                  |
| Sham+Vehicle vs. MCAO+A151                 | < 0.0001                  |
| MCAO+Vehicle vs. MCAO+A151                 | 0.0003                    |
| GSDMD                                      |                           |
| Sham+Vehicle vs. MCAO+Vehicle              | < 0.0001                  |
| Sham+Vehicle vs. MCAO+A151                 | 0.0107                    |
| MCAO+Vehicle vs. MCAO+A151                 | < 0.0001                  |
| <b>Figure 3E</b>                           | <b>Individual P Value</b> |
| GSDMD                                      |                           |
| Sham+Vehicle vs. MCAO+Vehicle              | < 0.0001                  |
| Sham+Vehicle vs. MCAO+A151                 | 0.6282                    |
| MCAO+Vehicle vs. MCAO+A151                 | < 0.0001                  |
| Caspase-1                                  |                           |
| Sham+Vehicle vs. MCAO+Vehicle              | 0.0001                    |
| Sham+Vehicle vs. MCAO+A151                 | 0.9008                    |
| MCAO+Vehicle vs. MCAO+A151                 | 0.0005                    |
| IL-1 $\beta$                               |                           |
| Sham+Vehicle vs. MCAO+Vehicle              | < 0.0001                  |
| Sham+Vehicle vs. MCAO+A151                 | 0.6244                    |
| MCAO+Vehicle vs. MCAO+A151                 | 0.0008                    |
| <b>Figure 4B</b>                           | <b>Individual P Value</b> |
| cGAS                                       |                           |
| Untreated vs. LPS                          | 0.0006                    |
| Untreated vs. LPS+poly (dA:dT)             | < 0.0001                  |
| Untreated vs. LPS+poly (dA:dT)+A151        | 0.0005                    |
| LPS vs. LPS+poly (dA:dT)                   | 0.0008                    |
| LPS vs. LPS+poly (dA:dT)+A151              | 0.9977                    |
| LPS+poly (dA:dT) vs. LPS+poly (dA:dT)+A151 | 0.001                     |
| STING                                      |                           |
| Untreated vs. LPS                          | 0.1355                    |
| Untreated vs. LPS+poly (dA:dT)             | 0.0001                    |
| Untreated vs. LPS+poly (dA:dT)+A151        | 0.0063                    |
| LPS vs. LPS+poly (dA:dT)                   | 0.0012                    |
| LPS vs. LPS+poly (dA:dT)+A151              | 0.1881                    |
| LPS+poly (dA:dT) vs. LPS+poly (dA:dT)+A151 | 0.0191                    |
| NF-kB                                      |                           |
| Untreated vs. LPS                          | 0.0249                    |
| Untreated vs. LPS+poly (dA:dT)             | 0.0004                    |
| Untreated vs. LPS+poly (dA:dT)+A151        | 0.1758                    |

|                                            |                           |
|--------------------------------------------|---------------------------|
| LPS vs. LPS+poly (dA:dT)                   | 0.0338                    |
| LPS vs. LPS+poly (dA:dT)+A151              | 0.5336                    |
| LPS+poly (dA:dT) vs. LPS+poly (dA:dT)+A151 | 0.0054                    |
| ASC                                        |                           |
| Untreated vs. LPS                          | 0.0289                    |
| Untreated vs. LPS+poly (dA:dT)             | < 0.0001                  |
| Untreated vs. LPS+poly (dA:dT)+A151        | 0.0367                    |
| LPS vs. LPS+poly (dA:dT)                   | 0.0034                    |
| LPS vs. LPS+poly (dA:dT)+A151              | 0.998                     |
| LPS+poly (dA:dT) vs. LPS+poly (dA:dT)+A151 | 0.0028                    |
| IL-1 $\beta$ (FL)                          |                           |
| Untreated vs. LPS                          | 0.2067                    |
| Untreated vs. LPS+poly (dA:dT)             | 0.0002                    |
| Untreated vs. LPS+poly (dA:dT)+A151        | 0.0178                    |
| LPS vs. LPS+poly (dA:dT)                   | 0.002                     |
| LPS vs. LPS+poly (dA:dT)+A151              | 0.3537                    |
| LPS+poly (dA:dT) vs. LPS+poly (dA:dT)+A151 | 0.0176                    |
| Caspase-1 (FL)                             |                           |
| Untreated vs. LPS                          | 0.0038                    |
| Untreated vs. LPS+poly (dA:dT)             | 0.0002                    |
| Untreated vs. LPS+poly (dA:dT)+A151        | 0.0007                    |
| LPS vs. LPS+poly (dA:dT)                   | 0.0813                    |
| LPS vs. LPS+poly (dA:dT)+A151              | 0.4814                    |
| LPS+poly (dA:dT) vs. LPS+poly (dA:dT)+A151 | 0.5545                    |
| GSDMD                                      |                           |
| Untreated vs. LPS                          | 0.0701                    |
| Untreated vs. LPS+poly (dA:dT)             | 0.009                     |
| Untreated vs. LPS+poly (dA:dT)+A151        | 0.8475                    |
| LPS vs. LPS+poly (dA:dT)                   | 0.4779                    |
| LPS vs. LPS+poly (dA:dT)+A151              | 0.2166                    |
| LPS+poly (dA:dT) vs. LPS+poly (dA:dT)+A151 | 0.0266                    |
| <b>Figure 4D</b>                           | <b>Individual P Value</b> |
| caspase-1                                  |                           |
| Untreated vs. LPS                          | 0.0566                    |
| Untreated vs. LPS+poly (dA:dT)             | 0.0002                    |
| Untreated vs. LPS+poly (dA:dT)+A151        | 0.0203                    |
| LPS vs. LPS+poly (dA:dT)                   | 0.0068                    |
| LPS vs. LPS+poly (dA:dT)+A151              | 0.8789                    |
| LPS+poly (dA:dT) vs. LPS+poly (dA:dT)+A151 | 0.0177                    |
| IL-1 $\beta$                               |                           |
| Untreated vs. LPS                          | 0.5143                    |
| Untreated vs. LPS+poly (dA:dT)             | 0.0044                    |
| Untreated vs. LPS+poly (dA:dT)+A151        | 0.5949                    |
| LPS vs. LPS+poly (dA:dT)                   | 0.0283                    |

|                                                           |                           |
|-----------------------------------------------------------|---------------------------|
| LPS vs. LPS+poly (dA:dT)+A151                             | 0.9988                    |
| LPS+poly (dA:dT) vs. LPS+poly (dA:dT)+A151                | 0.0231                    |
| <b>Fig 5B</b>                                             | <b>Individual P Value</b> |
| Vehicle vs. A151                                          |                           |
| CD45 <sup>high</sup> CD11b <sup>+</sup> ly6G <sup>+</sup> | 0.0056367                 |
| CD45 <sup>high</sup> CD11b <sup>+</sup> F4/80             | 0.102738                  |
| CD45 <sup>high</sup> CD3 <sup>+</sup> CD4 <sup>+</sup>    | 0.864721                  |
| CD45 <sup>high</sup> CD3 <sup>+</sup> CD8 <sup>+</sup>    | 0.897487                  |
| CD45 <sup>high</sup> CD3 <sup>+</sup> NK1.1 <sup>+</sup>  | 0.983523                  |
| CD45 <sup>high</sup> CD3 <sup>+</sup> CD19 <sup>+</sup>   | 0.830728                  |
| <b>Fig 5C</b>                                             | <b>Individual P Value</b> |
| Vehicle vs. A151                                          |                           |
| CD11b <sup>+</sup> ly6G <sup>+</sup>                      | 0.00834513                |
| CD11b <sup>+</sup> F4/80                                  | 0.181893                  |
| CD3 <sup>+</sup> CD4 <sup>+</sup>                         | 0.931188                  |
| CD3 <sup>+</sup> CD8 <sup>+</sup>                         | 0.37043                   |
| CD3 <sup>+</sup> NK1.1 <sup>+</sup>                       | 0.898708                  |
| CD3 <sup>+</sup> CD19 <sup>+</sup>                        | 0.473554                  |
| <b>Fig 5D</b>                                             | <b>Individual P Value</b> |
| Vehicle vs. A151                                          |                           |
| CD11b <sup>+</sup> CD45 <sup>high</sup>                   | 0.0214                    |
| <b>Fig 5E</b>                                             | <b>Individual P Value</b> |
| Vehicle vs. A151                                          |                           |
| IL-4                                                      | 0.6613                    |
| TGF- $\beta$                                              | 0.002                     |
| TNF- $\alpha$                                             | 0.0088                    |
| IL-6                                                      | 0.0301                    |
| <b>Fig 5G</b>                                             | <b>Individual P Value</b> |
| Vehicle vs. A151                                          |                           |
| ly6G <sup>+</sup> cells/mm <sup>3</sup>                   | 0.0051                    |
| <b>Fig 5I</b>                                             | <b>Individual P Value</b> |
| Vehicle vs. A51                                           |                           |
| Iba-1 <sup>+</sup> cells/mm <sup>3</sup>                  | 0.0025                    |
| <b>Figure 6B</b>                                          | <b>Individual P Value</b> |
| Vehicle vs. A151                                          |                           |
| mNSS                                                      |                           |
| 1 d                                                       | < 0.0001                  |
| 3 d                                                       | < 0.0001                  |
| 7 d                                                       | < 0.0001                  |
| 14 d                                                      | 0.0025                    |
| Corner test                                               |                           |
| 1 d                                                       | 0.0003                    |



|                                            |                           |
|--------------------------------------------|---------------------------|
| 3 d                                        | < 0.0001                  |
| 7 d                                        | 0.0065                    |
| 14 d                                       | 0.0432                    |
| Foot fault test                            |                           |
| 1 d                                        | < 0.0001                  |
| 3 d                                        | 0.0003                    |
| 7 d                                        | 0.0098                    |
| 14 d                                       | 0.2169                    |
| Adhesive test                              |                           |
| 1 d                                        | < 0.0001                  |
| 3 d                                        | < 0.0001                  |
| 7 d                                        | < 0.0001                  |
| 14 d                                       | 0.0473                    |
| <b>Figure 6D</b>                           | <b>Individual P Value</b> |
| Infact volume                              |                           |
| Sham vs. Vehicle                           | < 0.0001                  |
| Sham vs. A151                              | < 0.0001                  |
| Vehicle vs. A151                           | 0.0159                    |
| edema volume                               |                           |
| Vehicle vs. A151                           | 0.0059                    |
| <b>Figure 6F</b>                           | <b>Individual P Value</b> |
| Vehicle vs. A151                           | 0.0004                    |
| <b>Figure 6H</b>                           | <b>Individual P Value</b> |
| Vehicle vs. A151                           | 0.0031                    |
| <b>Figure 7G</b>                           | <b>Individual P Value</b> |
| WT MCAO+Vehicle vs. cGAS KO MCAO+Vehicle   | 0.0113                    |
| WT MCAO+Vehicle vs. cGAS KO MCAO+A151      | 0.0055                    |
| cGAS KO MCAO+Vehicle vs. cGAS KO MCAO+A151 | > 0.9999                  |
| <b>Figure 7H</b>                           | <b>Individual P Value</b> |
| day 1                                      |                           |
| WT MCAO+Vehicle vs. cGAS KO MCAO+Vehicle   | < 0.0001                  |
| WT MCAO+Vehicle vs. cGAS KO MCAO+A151      | < 0.0001                  |
| cGAS KO MCAO+Vehicle vs. cGAS KO MCAO+A151 | > 0.9999                  |
| day 3                                      |                           |
| WT MCAO+Vehicle vs. cGAS KO MCAO+Vehicle   | 0.0001                    |
| WT MCAO+Vehicle vs. cGAS KO MCAO+A151      | < 0.0001                  |
| cGAS KO MCAO+Vehicle vs. cGAS KO MCAO+A151 | > 0.9999                  |
| <b>Appendix Figure S1A</b>                 | <b>Individual P Value</b> |
| Vehicle vs. A151                           |                           |
| AIM2                                       | 0.0586                    |
| ASC                                        | 0.0954                    |
| Caspase-1                                  | 0.0053                    |

|                                                                           |                           |
|---------------------------------------------------------------------------|---------------------------|
| IL-1 $\beta$                                                              | 0.0014                    |
| IL-6                                                                      | 0.0008                    |
| MCP-1                                                                     | 0.0105                    |
| <b>Appendix Figure S1B</b>                                                | <b>Individual P Value</b> |
| Vehicle vs. A151                                                          |                           |
| AIM2                                                                      | 0.047                     |
| ASC                                                                       | 0.0058                    |
| Caspase-1                                                                 | 0.0295                    |
| IL-1 $\beta$                                                              | 0.0178                    |
| IL-6                                                                      | 0.0056                    |
| MCP-1                                                                     | 0.028                     |
| <b>Appendix Figure S3A</b>                                                | <b>Individual P Value</b> |
| PBS vs. A151                                                              | 0.5982                    |
| <b>Appendix Figure S3B</b>                                                | <b>Individual P Value</b> |
| Untreated vs. LPS                                                         | 0.9999                    |
| Untreated vs. LPS+poly (dA:dT)                                            | 0.0001                    |
| Untreated vs. LPS+poly (dA:dT)+A151                                       | 0.0097                    |
| LPS vs. LPS+poly (dA:dT)                                                  | 0.0003                    |
| LPS vs. LPS+poly (dA:dT)+A151                                             | 0.1281                    |
| LPS+poly (dA:dT) vs. LPS+poly (dA:dT)+A151                                | 0.0228                    |
| <b>Appendix Figure S4A</b>                                                | <b>Individual P Value</b> |
| Vehicle vs. A151                                                          |                           |
| CCL2                                                                      | 0.0127                    |
| CCL5                                                                      | 0.7927                    |
| CXCL1                                                                     | 0.4693                    |
| CXCL2                                                                     | 0.7748                    |
| CXCL10                                                                    | 0.0088                    |
| <b>Appendix Figure S5C</b>                                                | <b>Individual P Value</b> |
| Vehicle vs. A151                                                          |                           |
| IL-6                                                                      | 0.0843                    |
| TNF-a                                                                     | 0.0141                    |
| IL-4                                                                      | 0.0445                    |
| TGF- $\beta$                                                              | 0.7087                    |
| <b>Appendix Figure S6B</b>                                                | <b>Individual P Value</b> |
| Penumbra. ki67 <sup>+</sup> Iba-1 <sup>+</sup> cell/mm <sup>3</sup>       | 0.0014                    |
| Ischemic core. ki67 <sup>+</sup> Iba-1 <sup>+</sup> cell/mm <sup>3</sup>  | 0.0921                    |
| <b>Appendix Figure S6D</b>                                                | <b>Individual P Value</b> |
| Penumbra. Tunel <sup>+</sup> Iba-1 <sup>+</sup> cell/mm <sup>3</sup>      | 0.0021                    |
| Ischemic core. Tunel <sup>+</sup> Iba-1 <sup>+</sup> cell/mm <sup>3</sup> | 0.3875                    |
| <b>Appendix Figure S7B</b>                                                | <b>Individual P Value</b> |
| Vehicle vs. A151                                                          | 0.0048                    |
| <b>Appendix Figure S7D</b>                                                | <b>Individual P Value</b> |
| Vehicle vs. A151                                                          | 0.0259                    |

| <b>Appendix Figure S8A</b> | <b>Individual P Value</b> |
|----------------------------|---------------------------|
| Vehicle vs. A151           |                           |
| mNSS                       |                           |
| 1 d                        | 0.0391                    |
| 3 d                        | 0.0221                    |
| 7 d                        | 0.0295                    |
| 14 d                       | 0.7042                    |
| Corner test                |                           |
| 1 d                        | 0.2719                    |
| 3 d                        | 0.0105                    |
| 7 d                        | 0.0219                    |
| 14 d                       | 0.0438                    |
| Foot fault test            |                           |
| 1 d                        | 0.0111                    |
| 3 d                        | 0.0209                    |
| 7 d                        | 0.045                     |
| 14 d                       | 0.1075                    |
| Adhesive test              |                           |
| 1 d                        | 0.1728                    |
| 3 d                        | 0.0317                    |
| 7 d                        | 0.0329                    |
| 14 d                       | 0.0494                    |
| <b>Appendix Figure S8C</b> | <b>Individual P Value</b> |
| Vehicle vs. A151           | 0.0057                    |
| <b>Appendix Figure S9A</b> | <b>Individual P Value</b> |
| WT vs. cGAS-KO             |                           |
| Microglia                  | 0.029                     |
| Spleen                     | 0.4313                    |
